# Supplementary material for: Bifunctional TiO2 underlayer for α-Fe2O3 nanorod based photoelectrochemical cells: enhanced interface and Ti4+ doping
Source: Royal Society of Chemistry journal article supplement (doi:10.1039/c4ta06315e), 2015-01-01
Supplement: c4ta06315e1.pdf [file c4ta06315e1.pdf]

# Electronic Supplementary Information (ESI)

## **Bifunctional TiO<sub>2</sub> underlayer for $\alpha$ -Fe<sub>2</sub>O<sub>3</sub> Nanorod based PEC cell: Enhanced interface and Ti<sup>4+</sup> doping**

Alagappan Annamalai<sup>a</sup>, Pravin S Shinde<sup>a,b</sup>, Arunprabakaran Subramanian<sup>a</sup>, Jae Young Kim<sup>b</sup>, Jin Hyun Kim<sup>b</sup>, Sun Hee Choi<sup>c</sup>, Jae Sung Lee<sup>b</sup> and Jum Suk Jang<sup>a\*</sup>

<sup>a</sup>Division of Biotechnology, College of Environmental and Bioresource Sciences, Chonbuk National University, Iksan 570-752, Republic of Korea

<sup>b</sup>School of Energy and Chemical engineering, Ulsan National Institute of Science and Technology, 50 UNIST-gil, Ulsan 689-798, Republic of Korea

<sup>c</sup>Pohang Accelerator Laboratory (PAL), Pohang University of Science and Technology (POSTECH), Pohang 790–784, Republic of Korea

\* Corresponding author. E-mail address: [jangjs75@jbnu.ac.kr](mailto:jangjs75@jbnu.ac.kr)

## 1. Supporting figures and captions.

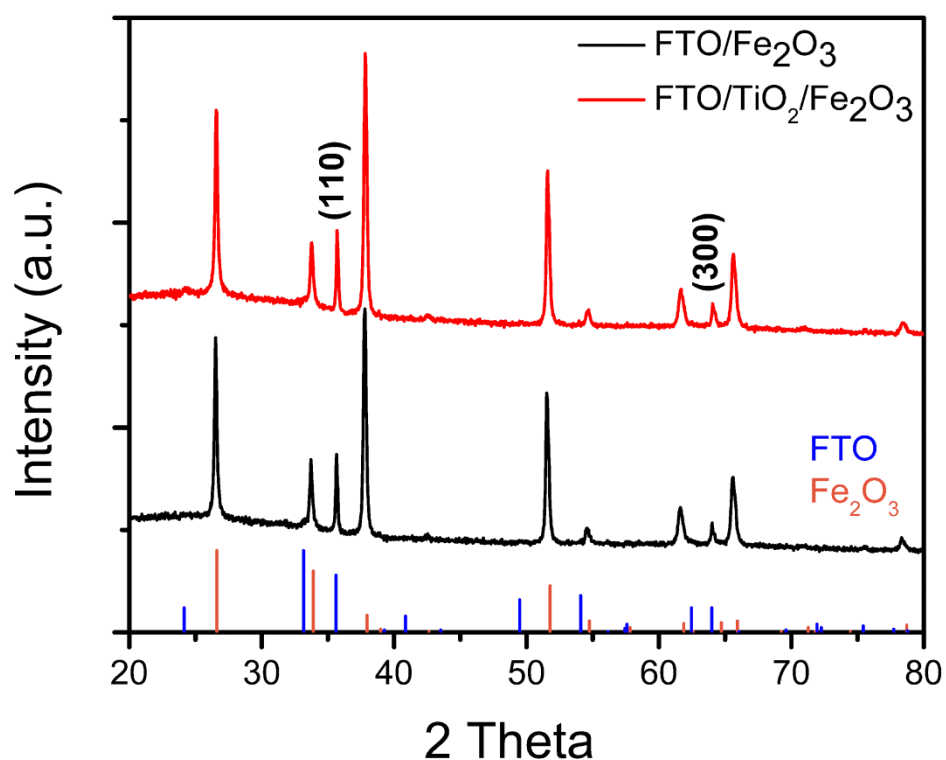

**Fig. S1.** X-ray diffraction patterns of FTO/ $\alpha$ -Fe<sub>2</sub>O<sub>3</sub> and FTO/TiO<sub>2</sub>/ $\alpha$ -Fe<sub>2</sub>O<sub>3</sub> photoanodes annealed at 800°C. With the exception of FTO substrate peaks, all other peaks can be indexed to  $\alpha$ -Fe<sub>2</sub>O<sub>3</sub> (JCPDS card # 33-0664). Both FTO/ $\alpha$ -Fe<sub>2</sub>O<sub>3</sub> and FTO/TiO<sub>2</sub>/ $\alpha$ -Fe<sub>2</sub>O<sub>3</sub> samples display similar XRD patterns with a predominant (110) diffraction peak, which has been suggested as preferential direction for electron transport in hematite photoanodes.<sup>1</sup>

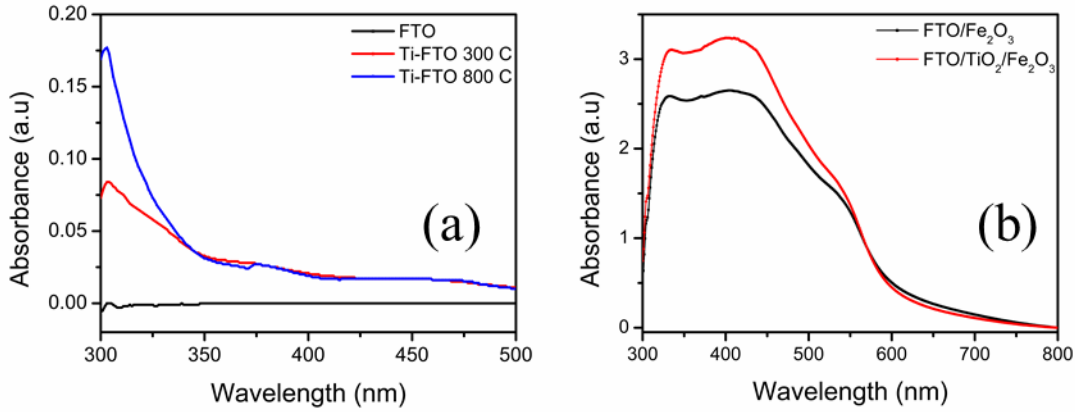

**Fig. S2.** (a) Optical property of FTO/TiO<sub>2</sub> samples sintered at various temperatures, which shows the absorption coefficient as a function of wavelength. The absorption edges near 350 nm are characteristic of TiO<sub>2</sub> thin films,<sup>2</sup> suggesting that the FTO substrates are successfully modified with TiO<sub>2</sub> layers after spin coating. Although 800°C sintered FTO/TiO<sub>2</sub> sample shows the highest value of absorption coefficient, this can result from the difference in film thickness. (b) FTO/TiO<sub>2</sub>/α-Fe<sub>2</sub>O<sub>3</sub> photoanodes annealed at 800 °C showed higher absorption when compared to FTO/α-Fe<sub>2</sub>O<sub>3</sub> photoanodes. Higher absorption can be interpreted as an implication of clustered α-Fe<sub>2</sub>O<sub>3</sub> density, which probably resulted from different nucleation mechanism during the hydrothermal synthesis or probably due to light scattering induced by the TiO<sub>2</sub> underlayers at the FTO/α-Fe<sub>2</sub>O<sub>3</sub> interface.

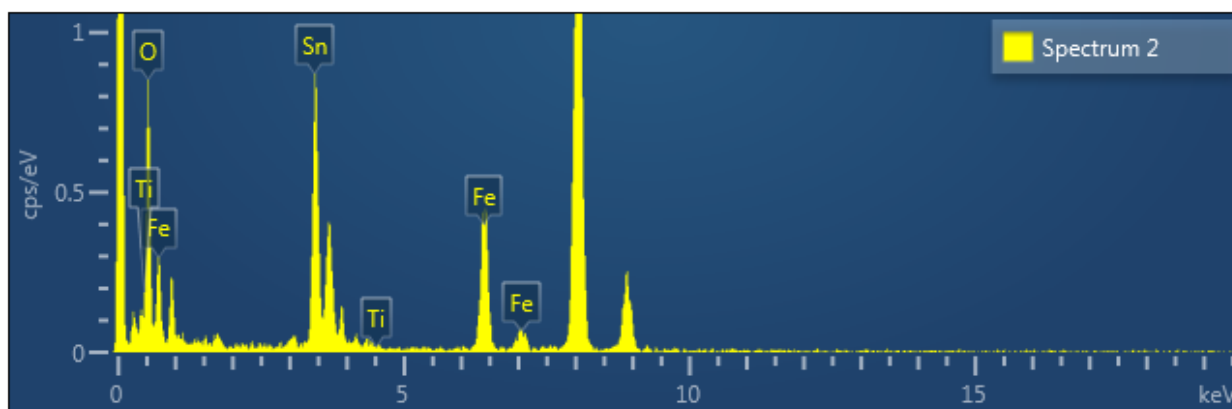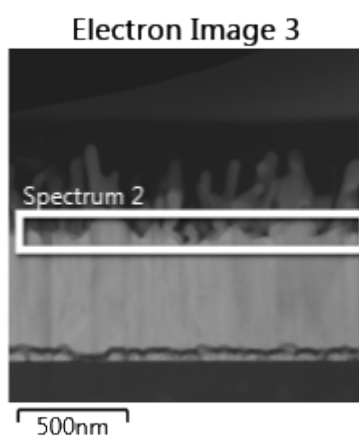

|              | Weight %     | Atomic %     |
|--------------|--------------|--------------|
| <b>O</b>     | <b>29.58</b> | <b>70</b>    |
| <b>Ti</b>    | <b>0.17</b>  | <b>0.14</b>  |
| <b>Fe</b>    | <b>20.54</b> | <b>14.01</b> |
| <b>Sn</b>    | <b>49.71</b> | <b>15.85</b> |
| <b>Total</b> | <b>100</b>   | <b>100</b>   |

**Fig. S3.** TEM-EDS mapping results conducted on FTO/TiO<sub>2</sub>/α-Fe<sub>2</sub>O<sub>3</sub> photoanodes annealed at 800°C.

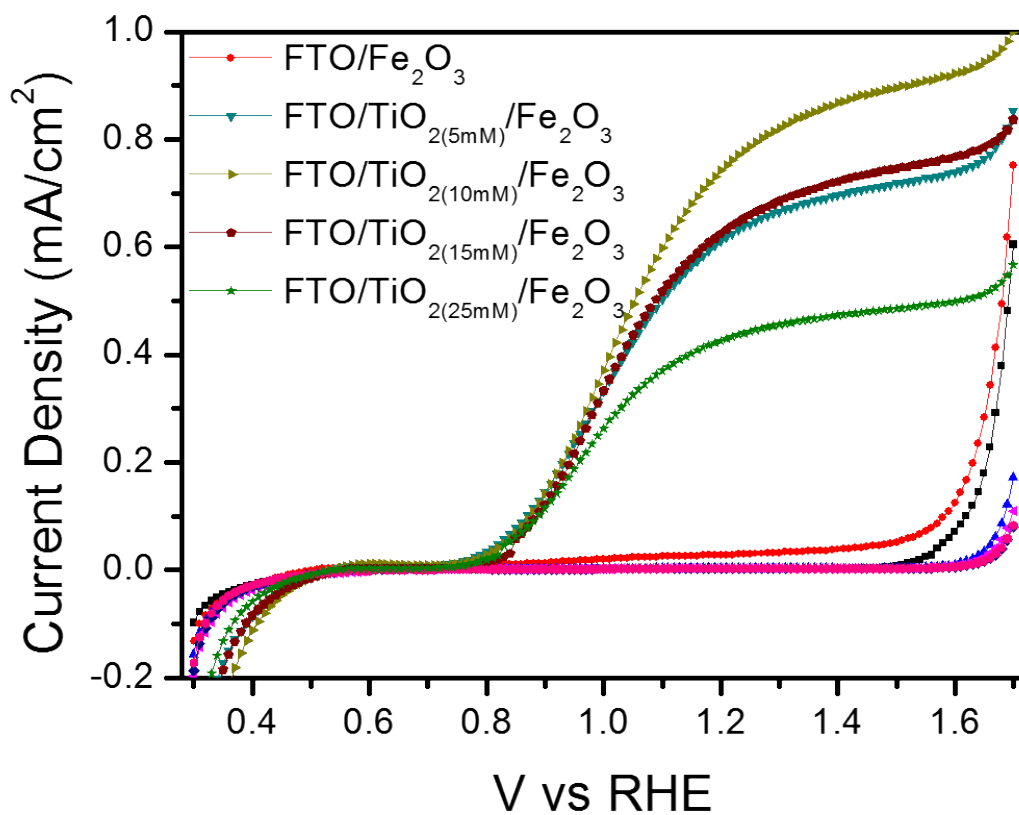

**Fig. S4.** Photocurrent-potential ( $J$ - $V$ ) curves for PEC water oxidation reaction of FTO/ $\alpha$ - $\text{Fe}_2\text{O}_3$  and FTO/ $\text{TiO}_2/\alpha$ - $\text{Fe}_2\text{O}_3$  photoanodes annealed at  $550^\circ\text{C}$  under standard illumination conditions. Photocurrent was sensitive to the thickness of  $\text{TiO}_2$  underlayers. There was a decrease in photocurrent increasing the  $\text{TiO}_2$  sol concentration more than 10mM.

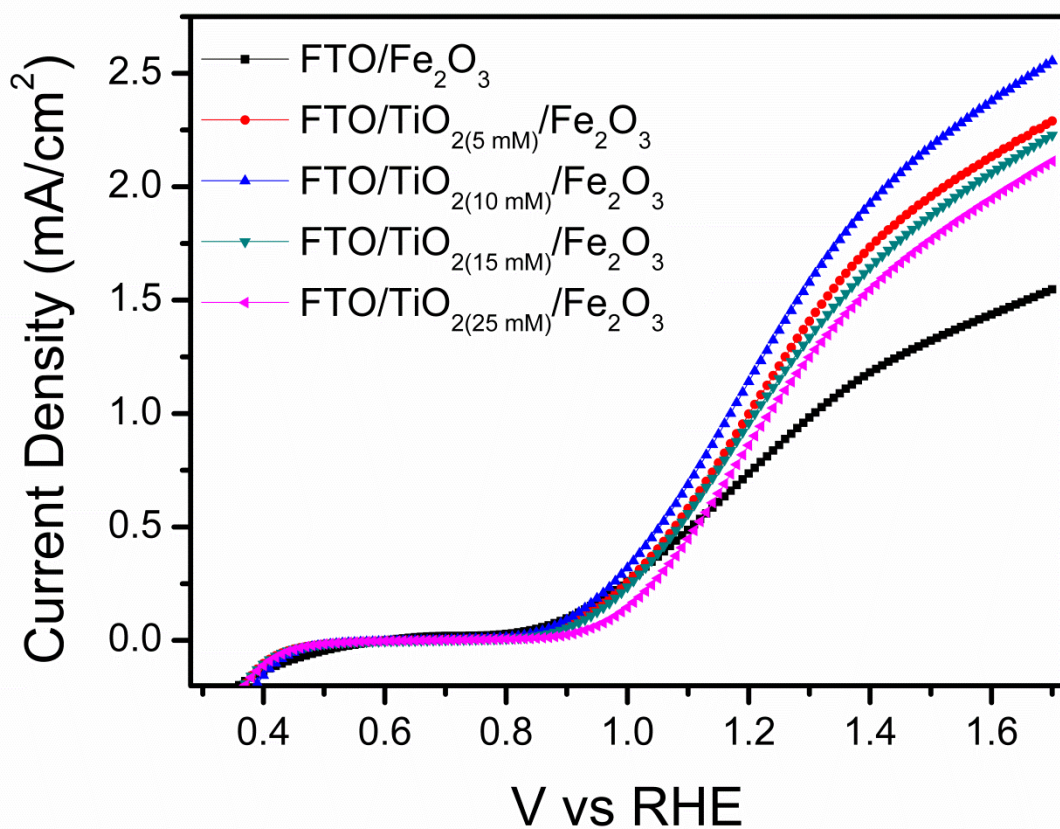

**Fig. S5.** Photocurrent-potential ( $J$ - $V$ ) curves for PEC water oxidation reaction of FTO/ $\alpha$ - $\text{Fe}_2\text{O}_3$  and FTO/ $\text{TiO}_2$ / $\alpha$ - $\text{Fe}_2\text{O}_3$  photoanodes annealed at  $800^\circ\text{C}$  under standard illumination conditions. Photocurrent was sensitive to the thickness of  $\text{TiO}_2$  underlayers. There was a decrease in photocurrent and an anodic shift for photoanodes increasing the  $\text{TiO}_2$  sol concentration more than 10mM.

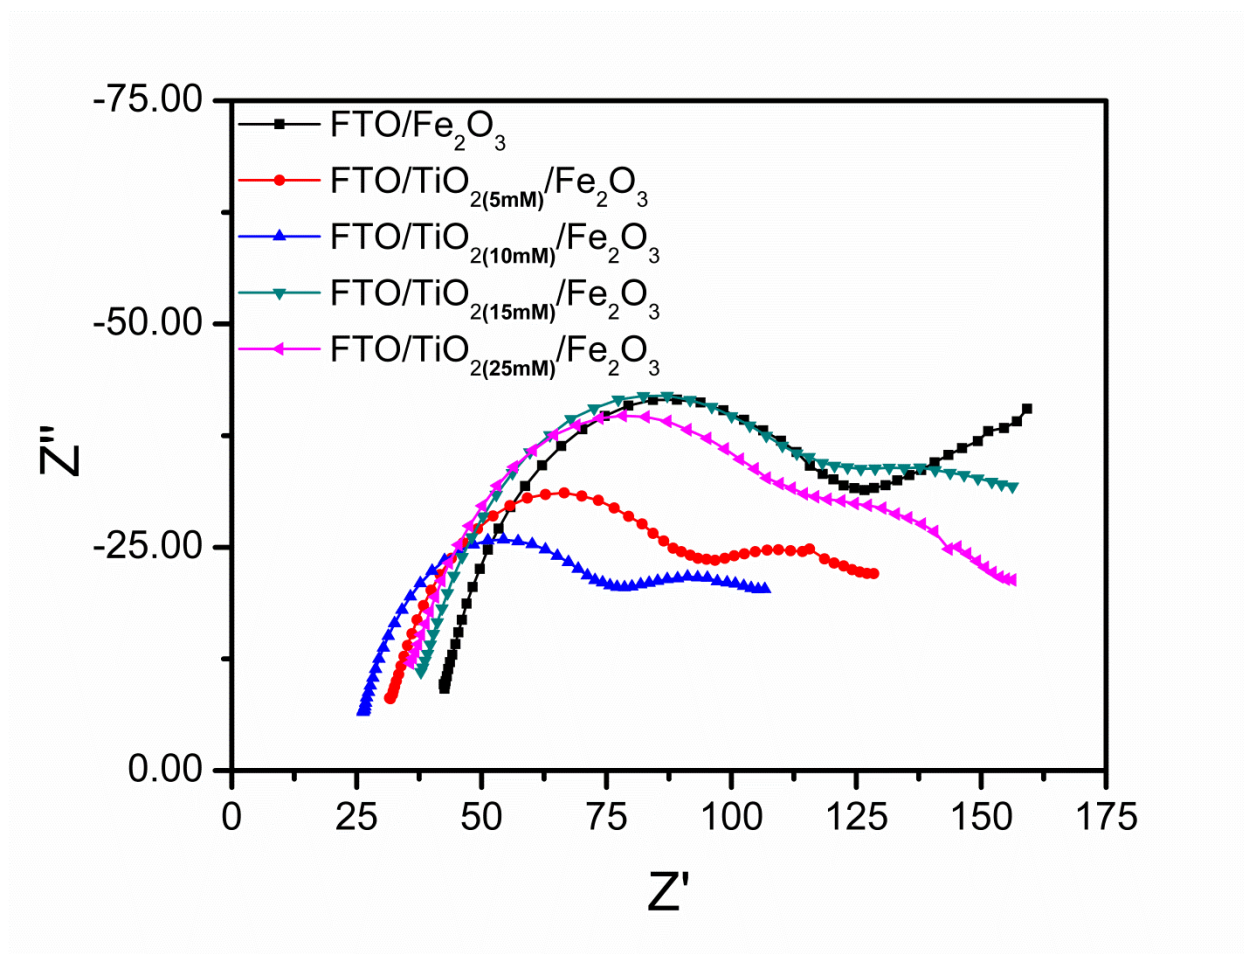

**Fig. S6.** Electrochemical impedance spectra for PEC water oxidation reaction of FTO/ $\alpha$ - $\text{Fe}_2\text{O}_3$  and FTO/ $\text{TiO}_2$ / $\alpha$ - $\text{Fe}_2\text{O}_3$  photoanodes annealed at  $800^\circ\text{C}$  under standard illumination conditions. There was a decrease in charge transport resistance with increasing the  $\text{TiO}_2$  sol concentration till 10mM. This can be due to reduced charge transport with increasing film thickness of the  $\text{TiO}_2$  underlayers.<sup>3</sup>

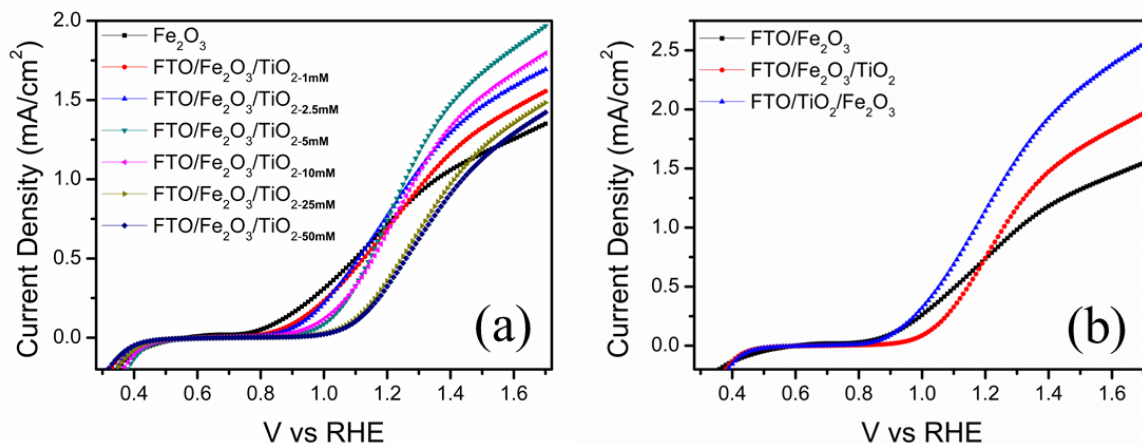

**Fig. S7.** (a) Photocurrent-potential (*J-V*) curves for PEC water oxidation reaction of various Ti concentration for Ti-doped hematite photoanodes annealed at 800°C under illumination (b) Photocurrent-potential (*J-V*) curves for PEC water oxidation reaction of FTO/α-Fe<sub>2</sub>O<sub>3</sub>, FTO/α-Fe<sub>2</sub>O<sub>3</sub>/TiO<sub>2</sub> and FTO/TiO<sub>2</sub>/α-Fe<sub>2</sub>O<sub>3</sub> photoanodes annealed at 800°C under standard illumination conditions.

In order to further investigate the intentional Ti doping effect, we performed an ex-situ Ti-doping by dipping the FTO/α-Fe<sub>2</sub>O<sub>3</sub> photoanodes in Ti precursor for two minutes and the followed by high temperature sintering to induce Ti<sup>4+</sup> dopants into hematite lattice.<sup>4</sup> Among various surface treatment conditions, 5 mM of Ti precursor showed highest photocurrent enhancement of 0.87 mA/cm<sup>2</sup> to that of bare Fe<sub>2</sub>O<sub>3</sub> photoanodes (0.77 mA/cm<sup>2</sup>) at 1.23 V vs RHE. However the observed photocurrent was much lower than FTO/TiO<sub>2</sub>/α-Fe<sub>2</sub>O<sub>3</sub> photoanodes annealed at 800°C and we observed a positive shift in the onset potential from 0.8 to 1.0 V vs RHE. The obtained shift in onset potential may be due to increased surface states after the surface treatment which limits the water oxidation kinetics.<sup>5</sup>



## Reference

1. A. Kay, I. Cesar and M. Gratzel, *J Am Chem Soc*, 2006, 128, 15714-15721.
2. S. Choudhury, R. Sasikala, V. Saxena, D. K. Aswal and D. Bhattacharya, *Dalton transactions*, 2012, 41, 12090-12095.
3. T. Hisatomi, J. Brillet, M. Cornuz, F. Le Formal, N. Tetreault, K. Sivula and M. Gratzel, *Faraday Discuss*, 2012, 155, 223-232.
4. R. Franking, L. S. Li, M. A. Lukowski, F. Meng, Y. Z. Tan, R. J. Hamers and S. Jin, *Energ Environ Sci*, 2013, 6, 500-512.
5. Y. C. Ling, G. M. Wang, D. A. Wheeler, J. Z. Zhang and Y. Li, *Nano Lett*, 2011, 11, 2119-2125.
